# Supplementary material
Source: PubMed Central journal article supplement (PMC6886364)
Supplement: NIHMS1055604-supplement-Figure_S1.pdf [file NIHMS1055604-supplement-Figure_S1.pdf]

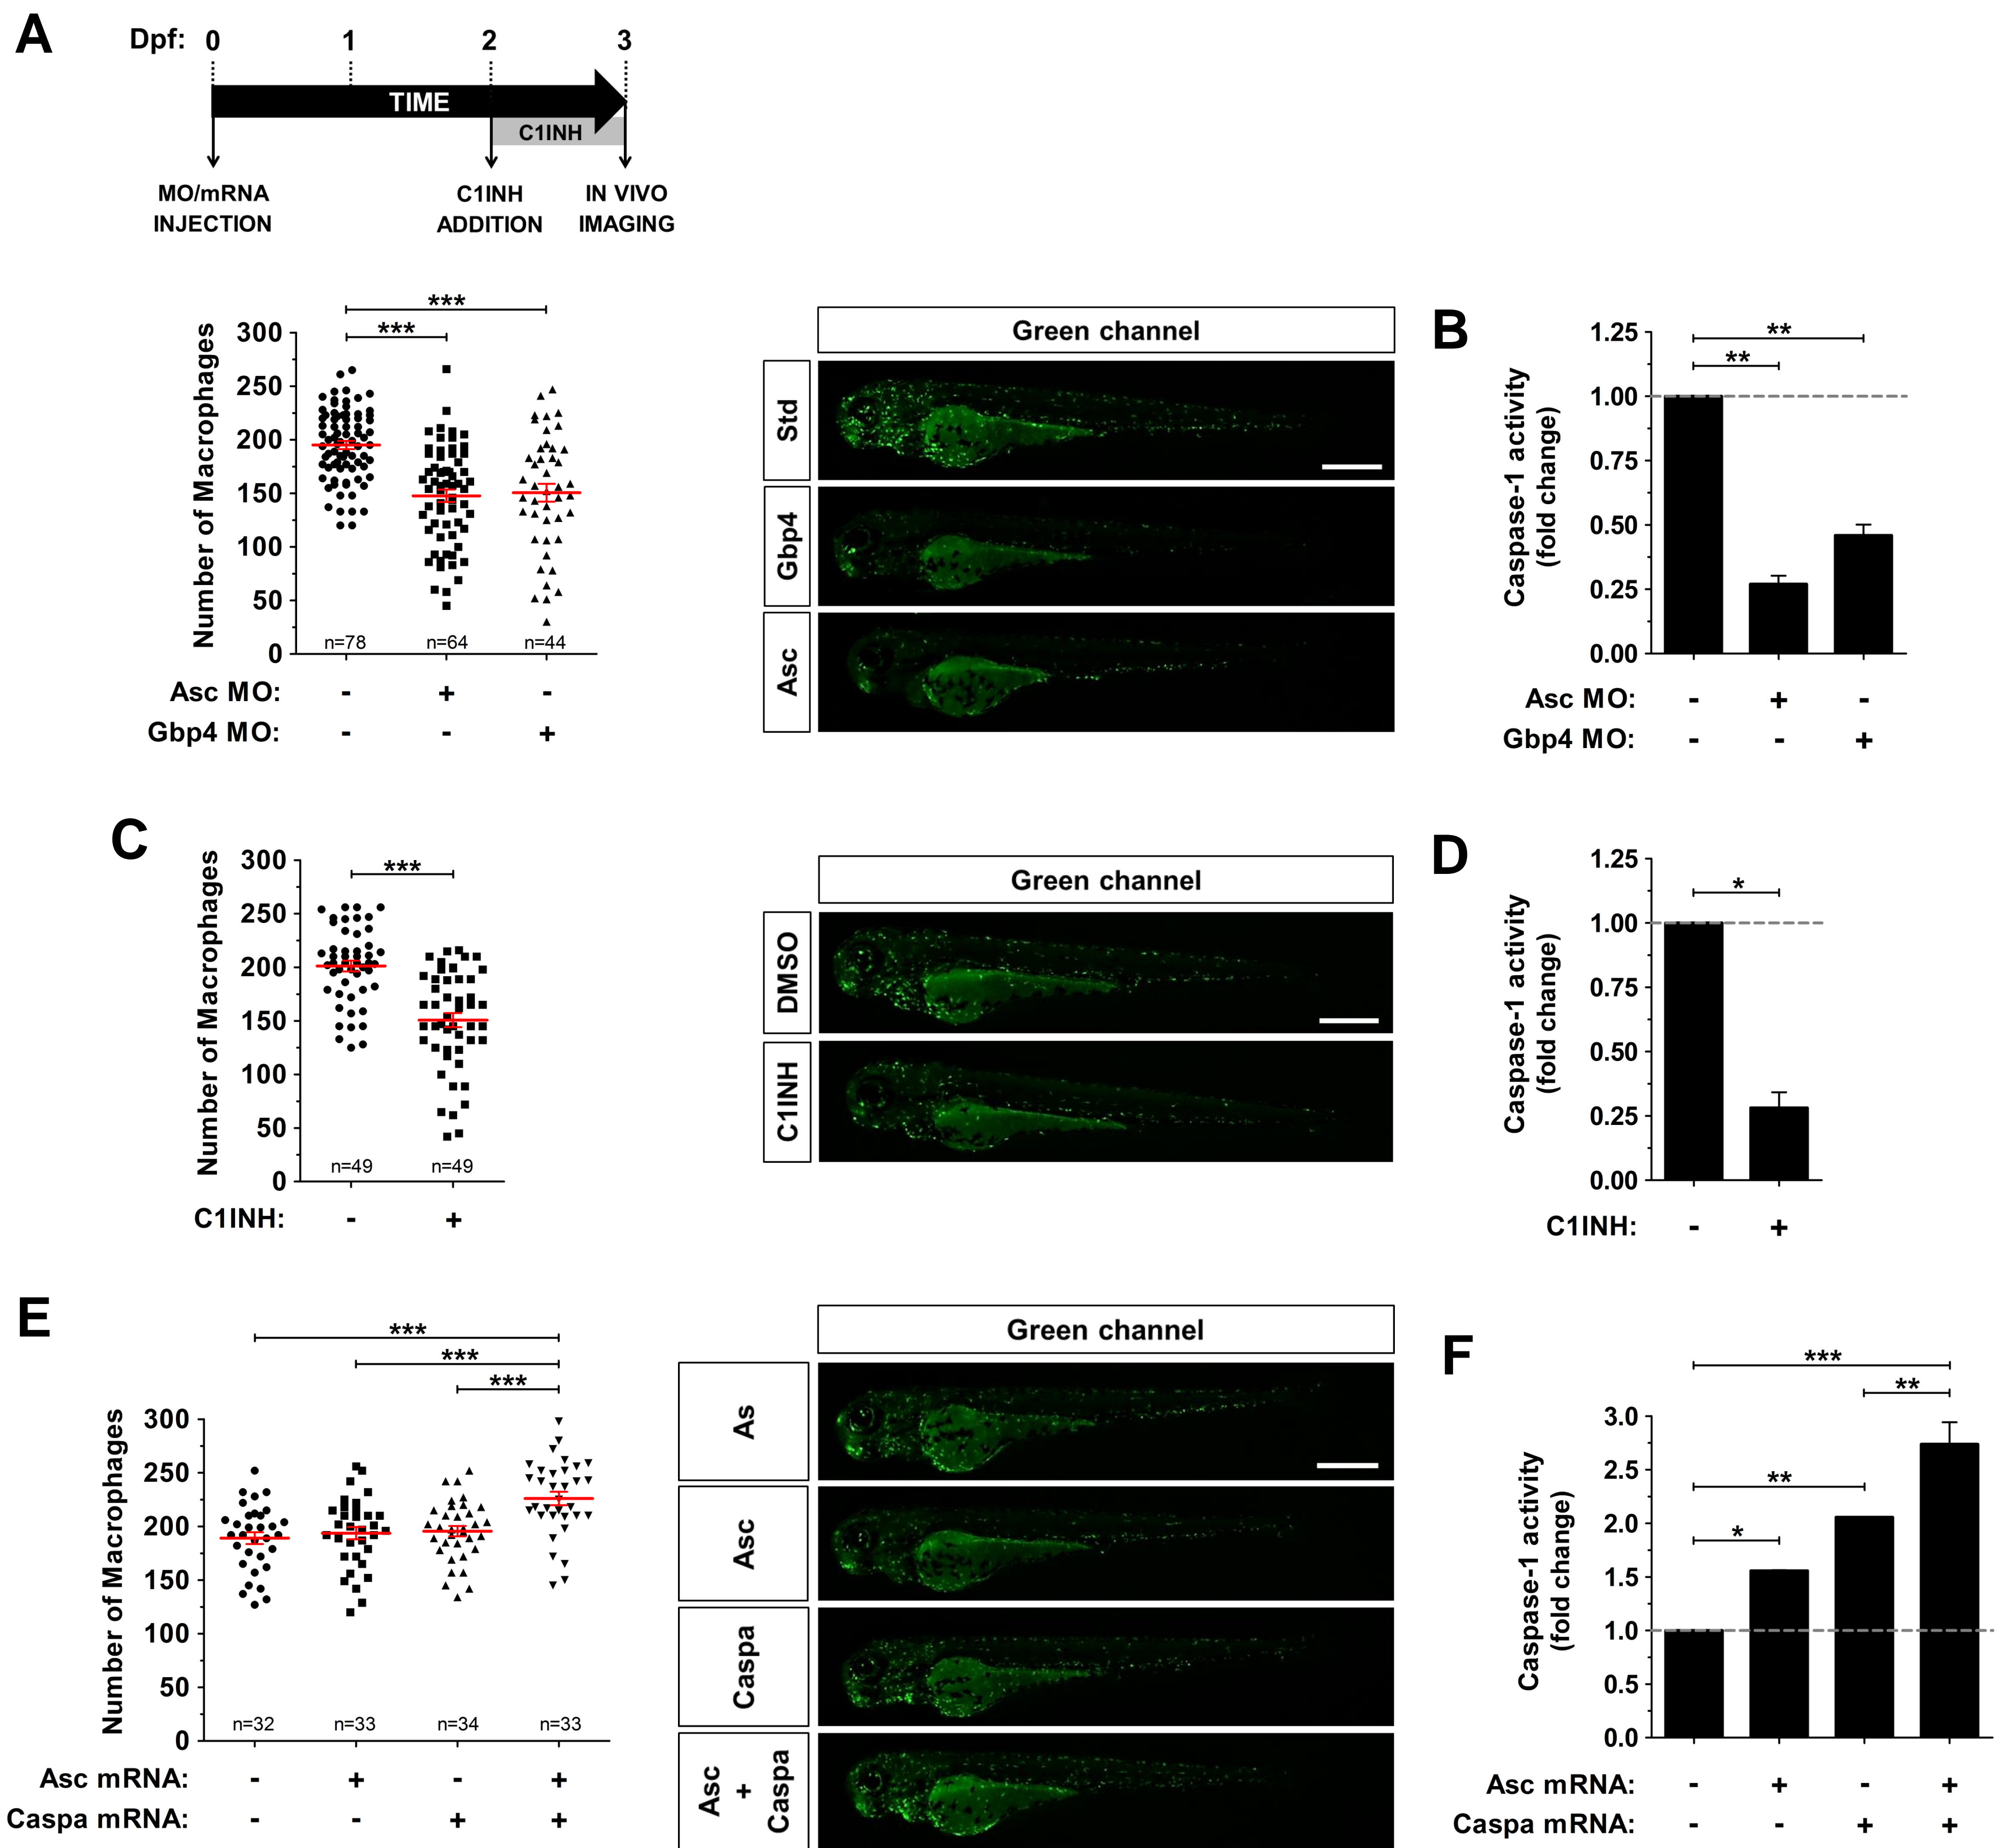

**Figure S1. Inflammasome inhibition decreases the number of macrophages in zebrafish larvae. Related to Figure 1.** *Tg(mpeg1:eGFP)* zebrafish one-cell embryos were injected with standard control (Std), Asc or Gbp4 MOs (A, B), or with antisense (As), Asc or/and Caspa mRNAs (E-F). Alternatively, *Tg(mpeg1:eGFP)* embryos were dechorionated manually at 48 hpf and treated by immersion with DMSO or the irreversible caspase-1 inhibitor Ac-YVAD-CMK (C1INH) (C, D). Each dot represents the number of macrophages from a single larva, while the mean  $\pm$  SEM for each group is also shown (A, C, E). The sample size (n) is indicated for each treatment. Representative images of green channels of whole larvae for the different treatments are also shown. Scale bars, 500  $\mu$ m. Caspase-1 activity in whole larvae was determined for each treatment at 72 hpf (one representative caspase-1 activity assay out of the three carried out is shown) (B, D, F). \* $p < 0.05$ ; \*\* $p < 0.01$ ; \*\*\* $p < 0.001$  according to ANOVA followed by Tukey multiple range test.
