# Supplementary material
Source: PubMed Central journal article supplement (PMC6886364)
Supplement: NIHMS1055604-supplement-Figure_S4.pdf [file NIHMS1055604-supplement-Figure_S4.pdf]

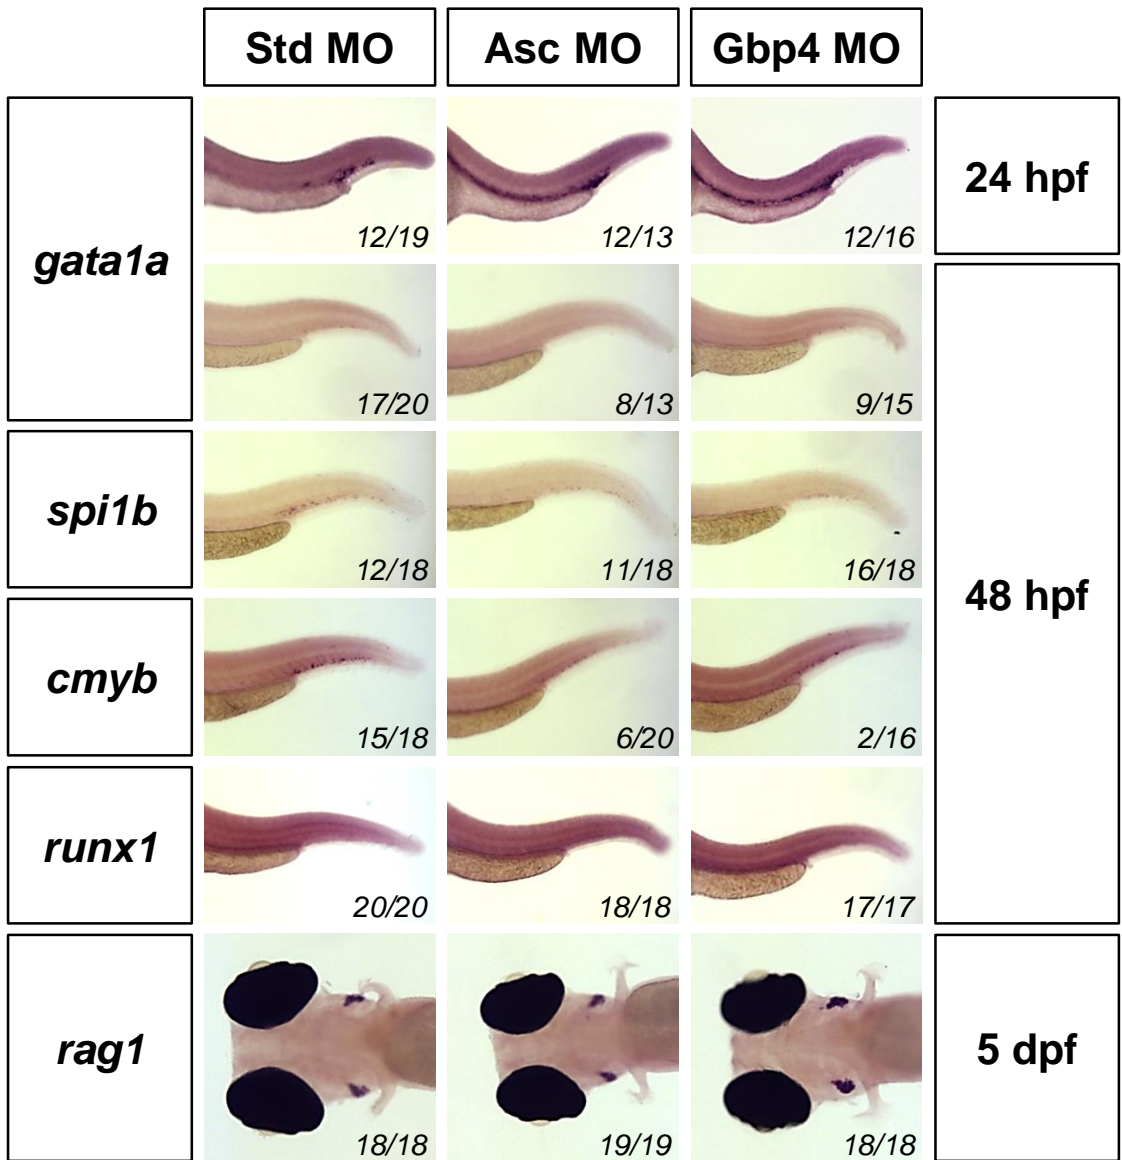

**Figure S4. Inflammasome activity regulates *gata1* expression levels in zebrafish larvae. Related to Figures 1 and 2.** Casper zebrafish one-cell embryos were injected with standard control (Std), Asc or Gbp4 MOs. At the indicated times, whole-mount *in situ* hybridization (WISH) was performed using antisense probes to the *gata1a*, *spi1b*, *gcsfr*, *cmyb*, *runx1* and *rag1* genes. Numbers in pictures represent the animals with the shown phenotype per total analyzed animals.
