# Supplementary material
Source: PubMed Central journal article supplement (PMC6886364)
Supplement: NIHMS1055604-supplement-Figure_S7.pdf [file NIHMS1055604-supplement-Figure_S7.pdf]

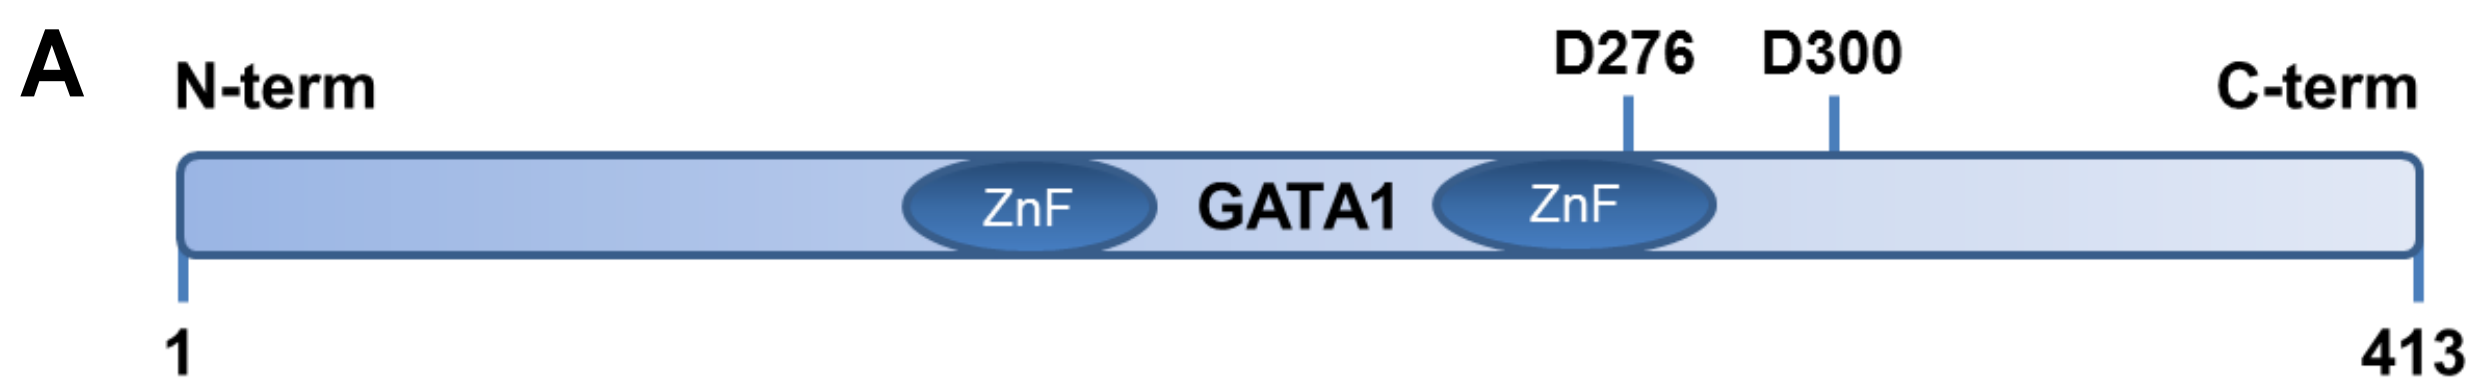

**B**

|             |   |   |   |
|-------------|---|---|---|
| FLAG-PCDNA: | + | - | - |
| FLAG-GATA1: | - | + | + |
| rCaspase-1: | + | - | + |

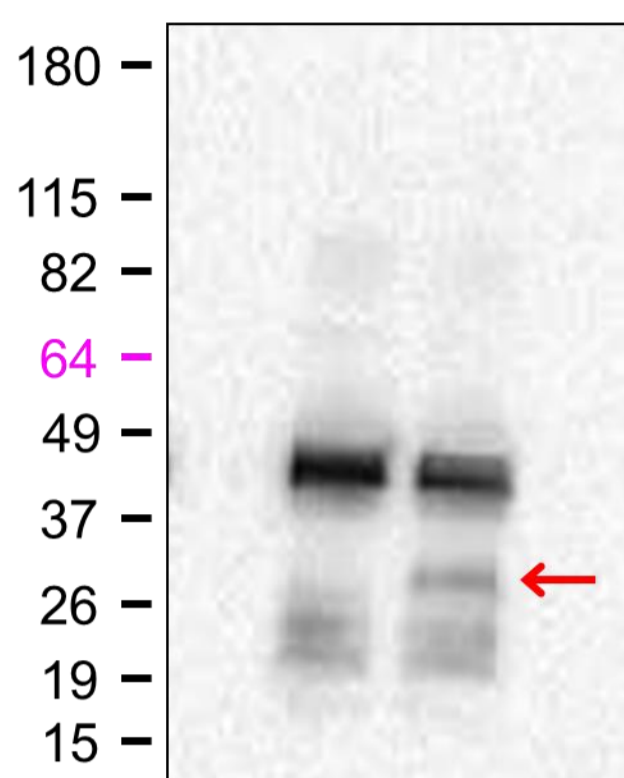

IP: FLAG  
WB: FLAG

**C**

|             |   |   |   |
|-------------|---|---|---|
| FLAG-PCDNA: | + | - | - |
| FLAG-GATA1: | - | + | + |
| rCaspase-1: | + | - | + |

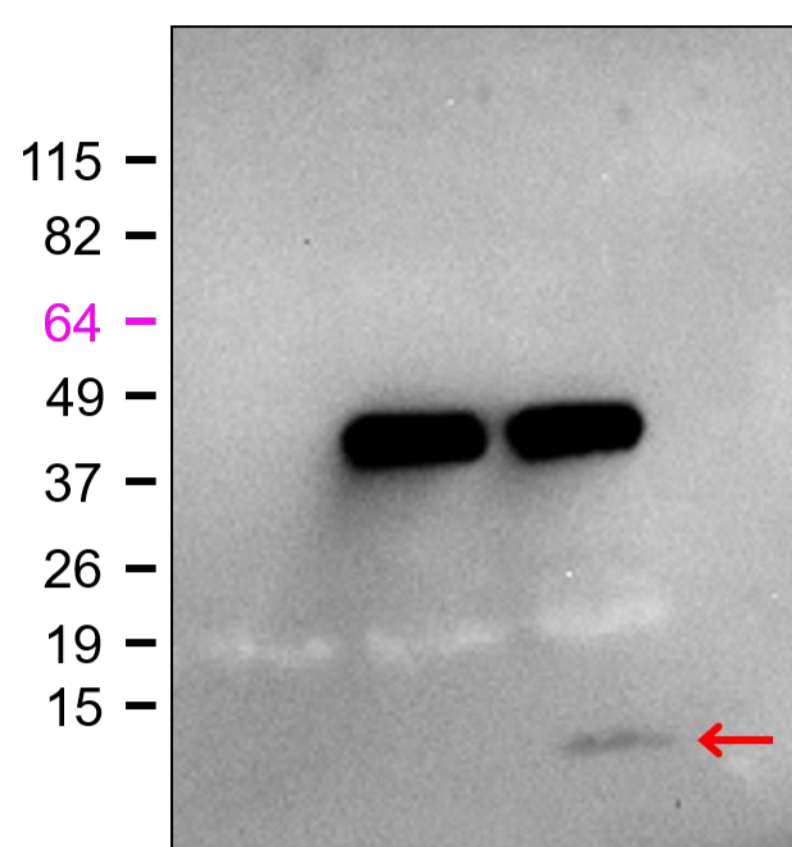

IP: FLAG  
WB: GATA1 (C-term)

**D**

|                    |   |   |   |   |   |   |   |   |   |
|--------------------|---|---|---|---|---|---|---|---|---|
| PCDNA-FLAG:        | + | - | - | - | - | - | - | - | - |
| GATA1-FLAG WT:     | - | + | + | - | - | - | - | - | - |
| GATA1-FLAG(D276E): | - | - | - | + | + | - | - | - | - |
| GATA1-FLAG(D300E): | - | - | - | - | - | + | + | - | - |
| GATA1-FLAG DM:     | - | - | - | - | - | - | - | + | + |
| rCaspase-1:        | + | - | + | - | + | - | + | - | + |

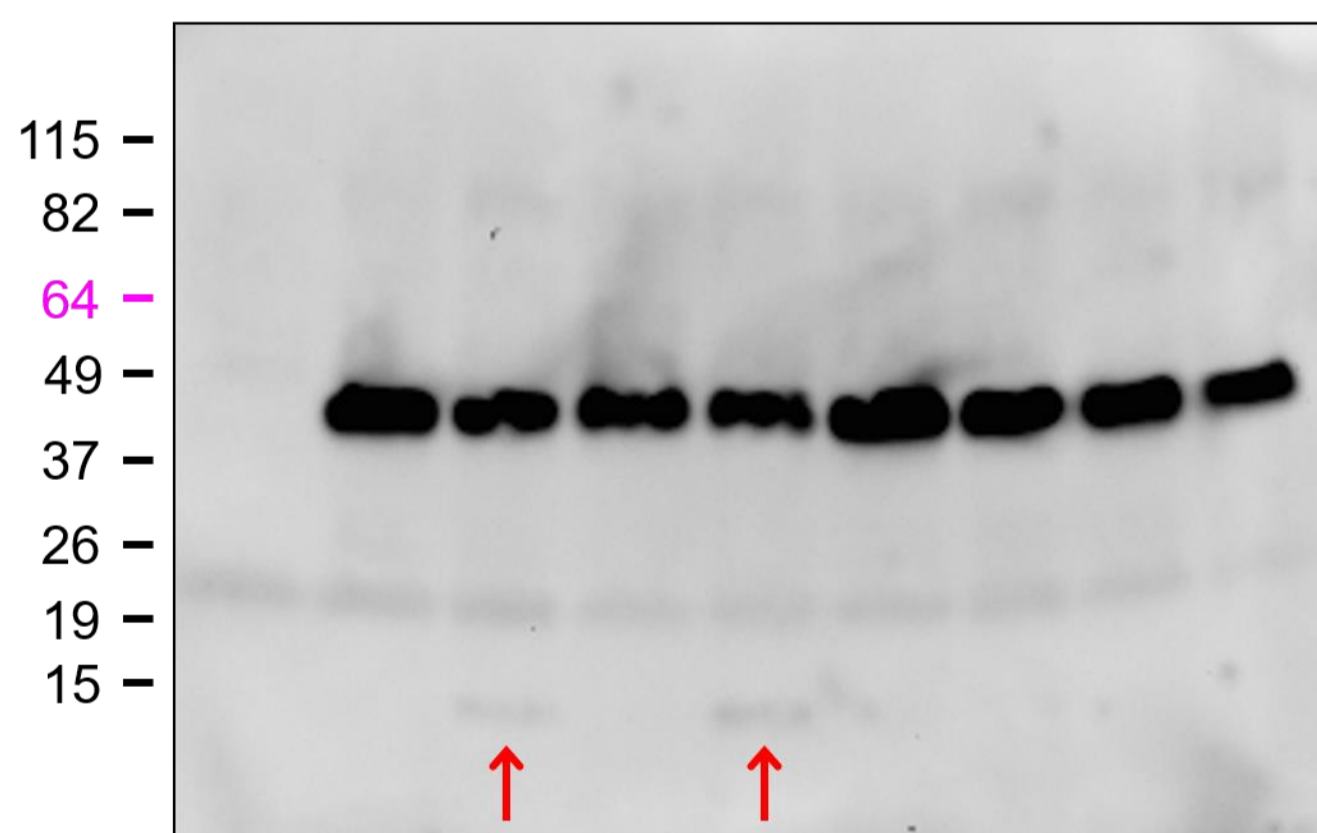

IP: FLAG  
WB: FLAG

**Figure S7. Caspase-1 cleaves *in vitro* human GATA1 in residue D300. Related to Figure 6.** (A) Scheme of human GATA1 showing the zinc finger domains and residues D276 and D300. (B-D) HEK293T cells were transfected with FLAG-empty or FLAG-GATA1 (B, C) and empty-FLAG, GATA1-FLAG wild type, GATA1-FLAG(D276A), GATA1-FLAG(D300E) or GATA1-FLAG(D276E/D300E) (DM) (D) expression plasmids. Twenty four hours after transfection, GATA1 was pulled down from cell extracts with anti-FLAG M2 affinity gel and treated or not for 2 h at 37°C with 10 IU human recombinant caspase-1. Full length GATA1 and the generated proteolytic fragments were resolved in SDS-PAGE and immunoblotted with anti-FLAG to visualize N-term (B) and C-term (D) GATA1, or anti-GATA1 to visualize C-term GATA1 (C). One representative western blot assay out of the two carried out is shown.
