# Supplementary material
Source: PubMed Central journal article supplement (PMC6886364)
Supplement: NIHMS1055604-supplement-Table_S1.pdf [file NIHMS1055604-supplement-Table_S1.pdf]

**Table S1. Morpholinos used in this study. Related to Figures 1, 2 , 4, 7, S1 and S2.**

The gene symbols followed the Zebrafish Nomenclature Guidelines ([http://zfin.org/zf\\_info/nomen.html](http://zfin.org/zf_info/nomen.html)).

| <b>Gene</b>   | <b>Ensembl ID</b>  | <b>Target</b> | <b>Sequence (5'→3')</b>   | <b>Concentration (mM)</b> | <b>Reference</b>      |
|---------------|--------------------|---------------|---------------------------|---------------------------|-----------------------|
| <i>pycard</i> | ENSDARG00000040076 | atg/5'UTR     | GCTGCTCCTTGAAAGATTCCGCCAT | 0.6                       | Tyrkaska et al., 2016 |
| <i>gfp4</i>   | ENSDARG00000068857 | e1/i1         | GCTGTTTGTGTGTCTCTAACCTGTT | 0.1                       |                       |
| <i>gata1a</i> | ENSDARG00000013477 | e1/i1         | GTTTGGACTCACCTGGACTGTGTCT | 0.2                       | Galloway et al., 2005 |
