# Supplementary material
Source: PubMed Central journal article supplement (PMC6886364)
Supplement: NIHMS1055604-supplement-Table_S2.pdf [file NIHMS1055604-supplement-Table_S2.pdf]

**Table S2. Primers used in this study for RT-qPCR. Related to Figure 4 and S5.** The gene symbols followed the Zebrafish Nomenclature Guidelines ([http://zfin.org/zf\\_info/nomen.html](http://zfin.org/zf_info/nomen.html)). ENA, European Nucleotide Archive (<http://www.ebi.ac.uk/ena/>).

| Gene          | ENA ID       | Name       | Sequence (5'→3')/Vendor |
|---------------|--------------|------------|-------------------------|
| <i>rps11</i>  | NM_213377    | F1         | GGCGTCAACGTGTCAGAGTA    |
|               |              | R1         | GCCTCTTCTCAAAACGGTTG    |
| <i>gata1a</i> | NM_131234    | F1         | CGTTGGGTGTCCCCCGGTCT    |
|               |              | R1         | ACGAGGCTCGGCTCTGGACG    |
| <i>spi1b</i>  | NM_198062    | F1         | TGTTACCCTCACAACGTCCA    |
|               |              | R1         | GCAGAAGGTCAAGCAGGAAC    |
| <i>gcsfa</i>  | FM174388     | F1         | TGAAGCAACGACCCTGTCGCA   |
|               |              | R1         | CCGCGGCCTCAGTCTGGAAA    |
| <i>mcsfa</i>  | NM_001114480 | F1         | AGCCCACAAAGCCAAGGTAA    |
|               |              | R1         | CTGACGCTCTGTGAAGGTGT    |
| <i>ACTB</i>   | NM_001101    | H_ACTB_1   | Sigma-Aldrich           |
| <i>PYCARD</i> | NM_013258    | H_PYCARD_1 |                         |
| <i>CASP1</i>  | NM_001257118 | H_CASP1_1  |                         |
| <i>NLRC4</i>  | NM_001199138 | H_NLRC4_1  |                         |
| <i>NLRP3</i>  | NM_001243133 | H_NLRP3_1  |                         |
